# Supplementary material for: Study on Flood Control Safety Evaluation Based on Composite Risk Model
Source: Copernicus journal article supplement (doi:10.5194/nhess-2019-236), 2019-07-25
Supplement: Supplementary file 1 [file data.xlsx]

## Sheet: Flood
Year	Flood	No
		1	1901	13000
1901	13000	2	1955	12100
		3	1954	11300
1931	8810	2	1977	9530
		3	1973	9220
1953	5390	4	1993	9110
1954	11300	5	1995	8966.1
1955	12100	6	1931	8810
1956	3500	7	1998	8126.3
1957	3600	8	1969	7400
1958	3630	9	1983	7350
1959	6800	10	1988	7260
1960	2740	11	1970	7170
1961	4260	12	1981	7030
1962	3920	13	1999	6940.7
1963	3270	14	1959	6800
1964	4680	15	1967	6270
1965	1820	16	1975	5650
1966	4780	17	1953	5390
1967	6270	18	2002	5384.6
1968	1850	19	1984	5240
1969	7400	20	1989	4960
1970	7170	21	1966	4780
1971	4260	22	1964	4680
1972	3550	23	1991	4650
1973	9220	24	1976	4620
1974	4320	25	1994	4396.6
1975	5650	26	1974	4320
1976	4620	27	1961	4260
1977	9530	28	1971	4260
1978	3840	29	1992	4000
1979	3190	30	1962	3920
1980	3620	31	1978	3840
1981	7030	32	2005	3754.4
1982	1910	33	1958	3630
1983	7350	34	1980	3620
1984	5240	35	2003	3606.2
1985	2660	36	1957	3600
1986	3550	37	1972	3550
1987	2150	38	1986	3550
1988	7260	39	1956	3500
1989	4960	40	1963	3270
1990	3170	41	1979	3190
1991	4650	42	2010	3186.3
1992	4000	43	1990	3170
1993	9110	44	2008	2889.9
1994	4396.6	45	1960	2740
1995	8966.1	46	1985	2660
1996	1716.65	47	2006	2418.13
1997	1336.27	48	2009	2297.1
1998	8126.3	49	1987	2150
1999	6940.7	50	1982	1910
2000	1486.94	51	2007	1850.03
2001	1494.35	52	1968	1850
2002	5384.6	53	1965	1820
2003	3606.2	54	1996	1716.65
2004	1657.37	55	2004	1657.37
2005	3754.4	56	2001	1494.35
2006	2418.13	57	2000	1486.94
2007	1850.03	58	1997	1336.27
2008	2889.9
2009	2297.1
2010	3186.3
