# Supplementary material for: Study on Flood Control Safety Evaluation Based on Composite Risk Model
Source: Copernicus journal article supplement (doi:10.5194/nhess-2019-236), 2019-07-25
Supplement: Supplementary file 1 [file nhess-2019-236-supplement.zip]

## Fortran 90 source code

```
PROGRAM RAERD_MAIN
IMPLICIT REAL(I-N)
INTEGER MX1,MX2
PARAMETER (MX1=1000,MX2=500)
INTEGER K,I,J,IQ,N1,N2,DT,T0,T(MX1)
INTEGER SA_SUM1,SA_SUM2,SA_SUM3,OC_SUM,SA_EPS,QB_out

COMMON /FRC/Q_in(MX1),V(MX1),Z(MX1),Q_out(MX1)
COMMON /RC/Q_d(MX1)
COMMON /CC/QQ(MX2),VV(MX2),ZZQ(MX2),ZZV(MX2)

OPEN(1,FILE='INPUT1.TXT')
OPEN(2,FILE='INPUT2.TXT')
OPEN(3,FILE='OUTPUT.TXT')

READ(1,*)DT,IQ,N1,N2

READ(1,*)SA_EPS,LAMD_CGM,LAMD_MIU,LAMD_MAX,LAMD_MIN,Qm_MAX,Qm_MI
N,LAMD_CGM1,LAMD_MAX1,LAMD_MIN1
  READ(1,*)Z_fpw1,Z_check
  READ(1,*)(Q_d(I),I=1,IQ)
  READ(2,*)(QQ(I),I=1,N1),(ZZQ(I),I=1,N1),&
    (VV(I),I=1,N2),(ZZV(I),I=1,N2)
  OC_SUM=0
  SA_SUM3=0
10  SA_SUM1=0
  LAMD1=LAMD_CGM1*Nf(IDUM)+LAMD_MIU
  IF (LAMD1.LE.LAMD_MAX1.AND.LAMD1.GE.LAMD_MIN1) THEN
    Zzero=LAMD1*Z_fpw1
    WRITE(*,*)Zzero
    SA_SUM3=SA_SUM3+1
    CALL IP(ZZQ,QQ,Zzero,QB_out,N1)
100  SA_SUM2=0
    LAMD=LAMD_CGM*Nf(IDUM)+LAMD_MIU
    IF (LAMD.LE.LAMD_MAX.AND.LAMD.GE.LAMD_MIN) THEN
      SA_SUM1=SA_SUM1+1
      Q_out(1)=QB_out*LAMD
200  Qm=Qm_MIN+Nf(IDUM)*(Qm_MAX-Qm_MIN)
      IF(Qm.LE.Qm_MAX.AND.Qm.GE.Qm_MIN) then
        SA_SUM2=SA_SUM2+1
        do I=1,IQ
          Q_in(I)=Q_d(I)*Qm/Qd
```

```

end do
    CALL FR(IQ,DT,N1,N2,Z_MAX,Zzero)
    IF(Z_MAX.GE.MAX) THEN
        MAX=Z_MAX
    ENDIF
    IF (Z_MAX.GE.Z_check) THEN
        OC_SUM=OC_SUM+1
    eND IF

    IF (SA_SUM2<SA_EPS) THEN

        GOTO 200
    ELSE
        IF (SA_SUM1<SA_EPS) THEN
            GOTO 100
        ELSE
            IF (SA_SUM3<SA_EPS) THEN
                GOTO 10
            else
                goto 1000
            end if
        end if
    goto 100
    END IF
ELSE
    GOTO 200
END IF
ELSE
    GOTO 100
END IF
ELSE
    GOTO 10
END IF

```

```

1000  RR_FC=OC_SUM*1.0/SA_EPS**3

```

```

! *****

```

```

! -----      Computed Result      -----

```

```

WRITE(3,*)"

```

```

WRITE(3,*)'

```

```

WRITE(3,2000)

```

Comprehensive risk rate '

```

WRITE(3,*)'    Total number of samples:                                ',SA_EPS**3
WRITE(3,*)
WRITE(3,*)'    Times of the water level exceeds the dam crest elevation:    ',OC_SUM
WRITE(3,*)
WRITE(3,*)'    Maximum water level                                ',MAX
WRITE(3,*)
WRITE(3,2200)RR_FC*100
2000 FORMAT(66('-'))
2200 FORMAT('                                Flood risk:                                ',F8.2,'%')
WRITE(3,2000)
END

```

! -----

!

+++++

++

! **N(0,1) Distributed Random Number Subprogram**

!

+++++

++

```

function NF(idum)
implicit real(i-n)
integer idum
real ran2,nf,v1,v2,fac

100  v1=ran2(idum)
      v2=ran2(idum)
      if (v1.gt.1.0) goto 100
      if (v1.eq.0.0) goto 100
      if (v2.gt.1.0) goto 100
      if (v2.eq.0.0) goto 100
      NF=sqrt(-2*log(v1))* cos(2*3.1415926*v2)
end

```

! -----

```

+++++
+
!           N(0,1) Distributed Random Number Subprogram
!
+++++
+
FUNCTION RAN2(idum)
INTEGER idum,IM1,IM2,IMM1,IA1,IA2,IQ1,IQ2,&
      IR1,IR2,NTAB,NDIV
REAL RAN2,AM,EPS,RNMX
PARAMETER (IM1=2147483563,IM2=2147483399,AM=1./IM1,&
      IMM1=IM1-1,IA1=40014,IA2=40692,IQ1=53668,&
      IQ2=52774,IR1=12211,IR2=3791,NTAB=32,&
      NDIV=1+IMM1/NTAB,EPS=1.2e-7,RNMX=1.-EPS)
INTEGER idum2,j,k,iv(NTAB),iy
SAVE iv,iy,idum2
DATA idum2/123456789/, iv/NTAB*0/, iy/0/
if (idum<=0) then
  idum=max(-idum,1)
  idum2=idum
  do j=NTAB+8,1,-1
    k=idum/IQ1
    idum=IA1*(idum-k*IQ1)-k*IR1
    if (idum<0) idum=idum+IM1
    if (j<=NTAB) iv(j)=idum
  end do
  iy=iv(1)
endif
k=idum/IQ1
idum=IA1*(idum-k*IQ1)-k*IR1
if (idum<0) idum=idum+IM1
k=idum2/IQ2
idum2=IA2*(idum2-k*IQ2)-k*IR2
if (idum2<0) idum2=idum2+IM2
j=1+iy/NDIV
iy=iv(j)-idum2
iv(j)=idum
if(iy<1) iy=iy+IMM1
RAN2=min(AM*iy,RNMX)
END

! -----

```

```

!
+++++
!                               Linear interpolation Subprogram
+++++

subroutine IP(xx,yy,x,y,n)
implicit real(i-n)
integer k,n
real xx(n),yy(n)

if (x.ge.xx(n).or.x.le.xx(1)) then
    if (x.ge.xx(n)) then
        y=yy(n)
    else
        y=yy(1)
    end if
end if
do k=1,n-1
    if (x.ge.xx(k).and.x.le.xx(k+1)) then
        if(xx(k).eq.xx(k+1))then
            y=(yy(k)+yy(k+1))*0.5
        else
            l1=(x-xx(k+1))/(xx(k)-xx(k+1))
            l2=(x-xx(k))/(xx(k+1)-xx(k))
            y=yy(k)*l1+yy(k+1)*l2
        end if
    end if
end do
end
!
-----

```

```

!
+++++
!
+++++
!                               Reservoir flood routing Subprogram
!
-----
SUBROUTINE FR(IQ,DT,N1,N2,Z_MAX,Zzero)
IMPLICIT REAL(I-N)
PARAMETER(MX1=1000,MX2=500)          !,MX3=5
INTEGER K,I,J,IQ,N1,N2,DT,T0,T(MX1)

```

```

COMMON /FRC/Q_in(MX1),Q_out(MX1),V(MX1),Z(MX1)
COMMON /CC/QQ(MX2),VV(MX2),ZZQ(MX2),ZZV(MX2)

K=1
Z(1)=Zzero
CALL IP(ZZV,VV,Z(1),V(1),N2)

500  Q1=Q_in(K)
     Q2=Q_in(K+1)
     V1=V(K)
     IN=1
     D1=Q_out(K)
     D2=D1
1000 V2=V1+DT*3600*(0.5*(Q1+Q2)-0.5*(D1+D2))
     CALL IP(VV,ZZV,V2,Z_CURVE,N2)
     CALL IP(ZZQ,QQ,Z_CURVE,D_CURVE,N1)
     IF (ABS(D2-D_CURVE).LE.1.0E-2) THEN
         Q_out(K+1)=D2
     ELSE
         D2=0.5*(D2+D_CURVE)
         IN=IN+1
         IF (IN.GT.2000) THEN
             DATAQ=ABS(D2-D_CURVE)
             IF(DATAQ.GT.1.0) WRITE(*,*)' Iterative calculation does not meet the
convergence accuracy requirements, please check!   $\Delta q =$  ', DATAQ
             GOTO 1100
         END IF
         GOTO 1000
     END IF
1100 V(K+1)=V2
     Z(K+1)=Z_CURVE

K=K+1
IF (K.LT.IQ) GOTO 500

CALL ORDER(IQ,Z_MAX)
END
! -----

```

```

!
+++++
+
!                               Z_MAX
!
+++++
+
      subroutine ORDER(IQ,Z_MAX)
      implicit real(I-N)
      parameter(MX1=1000)

      integer IQ,I,J
      real Z_MAX
      common /FRC/Q_in(MX1),Q_out(MX1),V(MX1),Z(MX1)

      Z_MAX=Z(1)
      do I=2,IQ
        if (Z(I)>Z_MAX) then
          Z_MAX=Z(I)
        end if
      end do
      end
! -----

```
